# Supplementary material
Source: PubMed Central journal article supplement (PMC6588499)

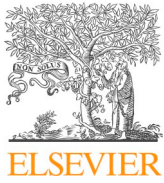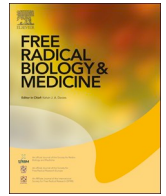

## Corrigendum

Corrigendum to “An augmentation in histone dimethylation at lysine nine residues elicits vision impairment following traumatic brain injury” [Free Radic. Biol. Med. (2019 Feb 18) 134 630–643]

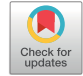

R. Gupta, P. Saha, T. Sen, N. Sen\*

Department of Neurological Surgery, University of Pittsburgh, 200 Lothrop Street, Scaife Hall, Pittsburgh, 15213, USA

The authors regret that there are two clerical mistakes remained in the published article — the data related to SD-OCT experiments in Fig. 2E and 7I, the ‘sham’ and ‘TBI’ were mislabelled, and it did not follow the results. Also, in Fig. 7E, the ‘sham’ and ‘TBI’ label were

missing. The revised figures were attached below.

The authors would like to apologise for any inconvenience caused.

Fig. 2E

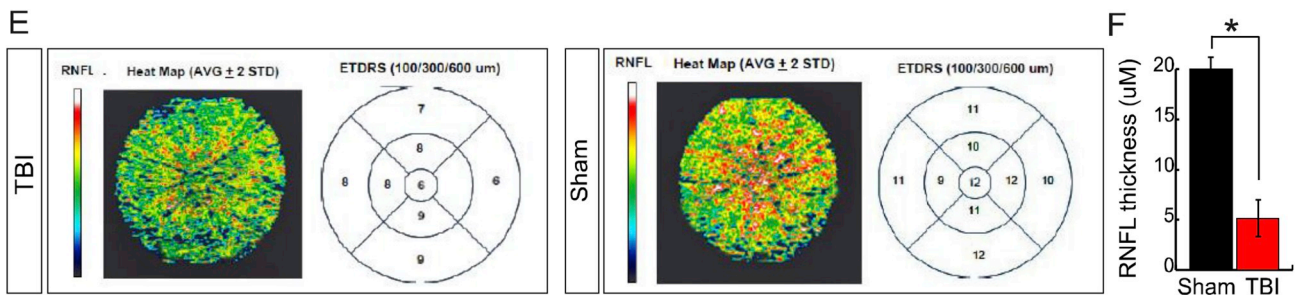

DOI of original article: <https://doi.org/10.1016/j.freeradbiomed.2019.02.015>

\* Corresponding author. University of Pittsburgh, Department of Neurosurgery, 200 Lothrop Street, Scaife Hall, A504, Pittsburgh, PA, 15213, USA.  
E-mail address: [senn@pitt.edu](mailto:senn@pitt.edu) (N. Sen).

<https://doi.org/10.1016/j.freeradbiomed.2019.04.010>

Available online 16 April 2019

0891-5849/ © 2019 Elsevier Inc. All rights reserved.

Fig. 7E

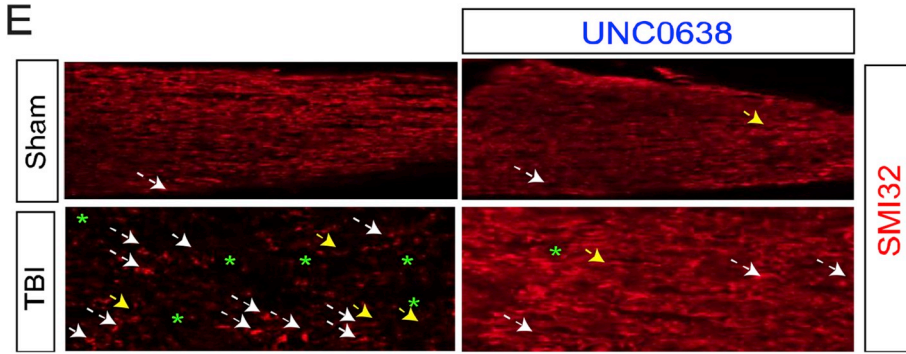

Fig. 7I

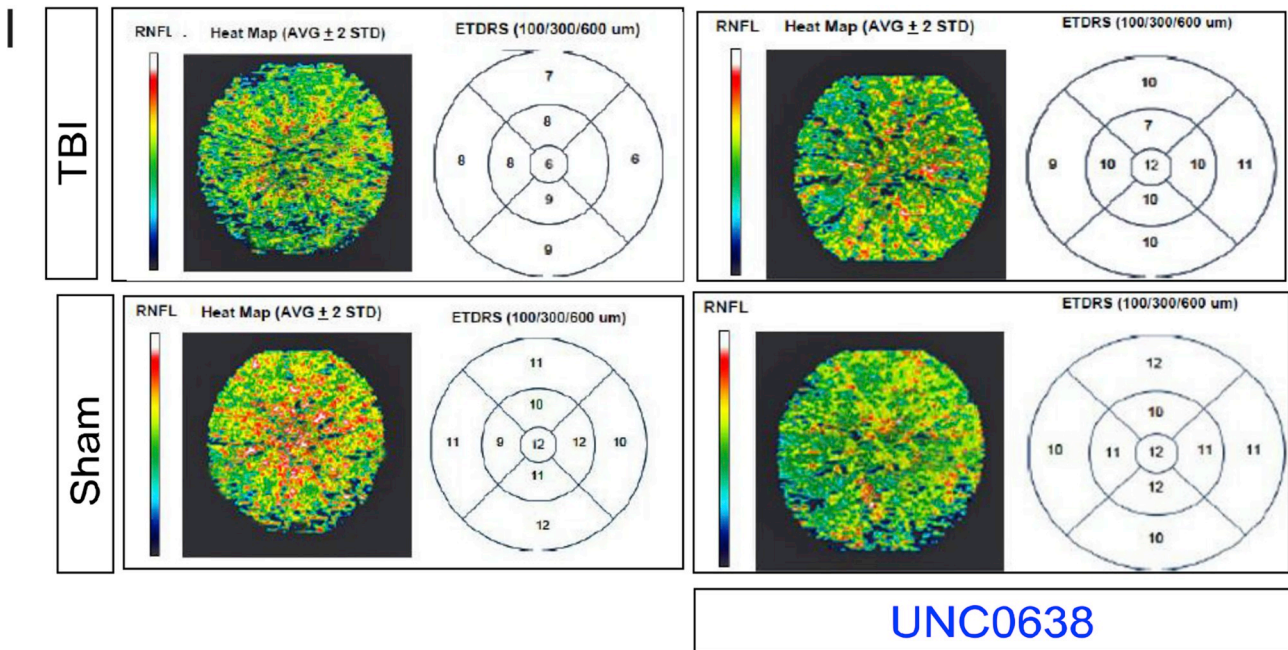

Supplement: NIHMS1019090-supplement-Corrigendum.pdf [file NIHMS1019090-supplement-Corrigendum.pdf]
